# A RESOURCE FOR THE ALLELE-SPECIFIC ANALYSIS OF DNA METHYLATION AT MULTIPLE GENOMICALLY IMPRINTED LOCI IN MICE

Jadiel A. Wasson<sup>2</sup>, Onur Birol<sup>1</sup>, and David J. Katz<sup>1</sup>

<sup>1</sup>Department of Cell Biology, Emory University School of Medicine, Atlanta, GA 30322

<sup>2</sup>Department of Molecular and Cellular Biology, Harvard University, Cambridge, MA 02138

## Abstract

Genomically imprinted loci are expressed mono-allelically dependent upon the parent of origin. Their regulation not only illuminates how chromatin regulates gene expression but also how chromatin can be reprogrammed every generation. Because of their distinct parent of origin regulation, analysis of imprinted loci can be difficult. Single nucleotide polymorphisms (SNPs) are required to accurately assess these elements allele-specifically. However, publicly available SNP databases lack robust verification, making analysis of imprinting difficult. In addition, the allele-specific imprinting assays that have been developed employ different mouse strains, making it difficult to systemically analyze these loci. Here, we have generated a resource that will allow the allele-specific analysis of many significant imprinted loci in a single hybrid strain of *Mus musculus*. This resource includes verification of SNPs present within ten of the most widely used imprinting control regions and allele-specific DNA methylation assays for each gene in a C57BL/6J and CAST/EiJ hybrid strain background.

# Introduction

Genomically imprinted loci, which are expressed mono-allelically dependent upon their parent-of-origin, highlight how DNA methylation and chromatin structure can regulate gene expression (Bartolomei and Ferguson-Smith 2011). For example, many of the chromatin mechanisms that regulate imprinted loci are involved in other contexts, including cancer biology and stem cell reprogramming. In addition, alterations at multiple imprinted loci can be used as a readout of global epigenetic misregulation. As a result, there is an increasing need to assay multiple imprinted loci in different mouse models. In this resource paper, we provide a streamlined resource for assaying the methylation status of a number of the most studied imprinted genes in a single hybrid strain background.

To date, approximately 150 imprinted genes have been identified in mice and about 100 in humans (Gregg *et al.* 2010; DeVeale *et al.* 2012; Kelsey and Bartolomei 2012). These genes tend to be organized on chromosomes in clusters (Wan and Bartolomei 2008; Bartolomei 2009). This clustering allows multiple imprinted loci to be regulated together, under the control of cis-regulatory domains termed imprinting control regions (ICRs) (Wan and Bartolomei 2008; Bartolomei 2009). ICRs are typically between 100 and 3700bp long and are rich in CpG dinucleotides (Bartolomei and Tilghman 1997; Barlow 2011; Ferguson-Smith 2011). In mammals, DNA methylation occurs mainly in the context of CpG dinucleotides, and within ICRs these CpG dinucleotides are differentially methylated dependent upon the parent-of-origin (Reik and Dean 2001; Reik and Walter 2001). This differential methylation determines the expression status of the multiple imprinted genes located within the imprinting cluster (Reik and Walter 2001). Therefore, to globally interrogate the epigenetic control of

genomically imprinted loci in a particular mouse model, it is necessary to be able to assay the DNA methylation status of multiple ICRs allele-specifically.

Assessing ICRs allele-specifically requires taking advantage of single nucleotide polymorphisms (SNPs). C57BL/6J (hereafter referred to as B6) mice are the most commonly used strain of *Mus musculus domesticus* and were the first mouse strain to be fully sequenced (Beck *et al.* 2000). To generate hybrids with SNPs on each allele, B6 mice can be crossed to *Mus musculus castaneus* (hereafter referred to as CAST) mice, which originate from a well-defined sub group of wild mice (Beck *et al.* 2000). Genome-wide DNA sequence analysis between different strains of *Mus musculus* revealed a 50% allelic difference between B6 and CAST at potential SNPs (Frazer *et al.* 2007). This makes these hybrid progeny especially useful for analyzing imprinted loci.

SNPs between B6 and CAST are cataloged in the Database of Single Nucleotide Polymorphisms (dbSNP) (<https://www.ncbi.nlm.nih.gov/projects/SNP/>) (Smigielski *et al.* 2000; Sherry *et al.* 2001). This database reports SNPs that have been observed in various assays performed by individual researchers, consortiums, and genome sequencing centers, for the purpose of facilitating genome-wide association studies (Smigielski *et al.* 2000; Sherry *et al.* 2001). Unfortunately, this database is phasing out all non-human organism data by September of 2017. However, very similar information will still be housed in the European variation archive (<http://www.ebi.ac.uk/eva/?Home>). This database overlaps with the dbSNP database and also the Sanger SNP viewer database ([https://www.sanger.ac.uk/sanger/Mouse\\_SnpViewer/rel-1505](https://www.sanger.ac.uk/sanger/Mouse_SnpViewer/rel-1505)) (Keane *et al.* 2011; Yalcin *et al.* 2011), which provides SNP information in multiple different strain backgrounds.

Using SNP's from all of these databases, we sought to develop allele-specific DNA methylation assays at multiple ICRs in a B6/CAST hybrid background. However, we encountered two significant hurdles. First, since the dbSNP database and the European variation archive are public repositories, many reported SNPs have not been additionally verified (Mitchell *et al.* 2004; Nekrutenko and Taylor 2012). Moreover, they currently have no minimum requirements for allelic frequencies (Mitchell *et al.* 2004; Nekrutenko and Taylor 2012). This further contributes to the lack of verification for many SNPs. As a result, false positives have been reported at a rate of between 15 and 17 percent (Mitchell *et al.* 2004; Nekrutenko and Taylor 2012). In addition, these two databases pool sequence differences from different strains into one combined output. Thus, we discovered that relying solely on the dbSNP database or European variation archive leads to an even higher rate of false positives within ICRs. These hurdles can partially be overcome by also incorporating the Sanger database, which contains information from individual strain backgrounds. However, a drawback of the Sanger database is that it contains much less information on intergenic regions, where many ICRs are found. For example, it contains no information on 3 of the ICRs that we sought to interrogate. In the end, we assessed 93 B6/CAST SNPs from the three databases at 10 of the most commonly studied mouse ICRs, and were able to validate only 18 of them (19%).

The second hurdle that we encountered is the generation of bisulfite PCR assays within ICRs. The gold standard in probing the DNA methylation status of any locus is bisulfite analysis (Hayatsu *et al.* 2008; Laird 2010). As bisulfite analysis relies on detecting base pair changes at CpG dinucleotides, primer sets used for bisulfite PCR



cannot contain any CpG dinucleotides because of the uncertainty of whether a cytosine base in the primer annealing sequence may be methylated. As a result, generating bisulfite-specific primer sets in these highly CpG-rich ICR regions can be difficult. In addition, because the CpG rich ICRs tend to be repetitive, finding primer sets that amplify a unique product can also be challenging.

Based on the significant hurdles we encountered, we identified a need for optimized protocols for allele specific DNA methylation analysis of ICRs in a B6/CAST hybrid mouse background. As a result, we developed a resource, including verification of SNPs present in ICRs, primer information, and optimal PCR conditions. This resource will enable the systematic interrogation of many significant imprinted genes in different mouse models.

## **Materials and Methods**

### **Bisulfite Analysis and Bisulfite-PCR optimization**

Mouse Tail DNA from single C57BL/6J and CAST/EiJ animals was used for the original identification of SNPs. Subsequently DNA from sagittal sections of perinatal pups was used for allele-specific DNA methylation analysis. Bisulfite conversion was done according to the Zymo EZ DNA Methylation Kit (Zymo D5001) protocol from 400ng of DNA. PCR products were amplified in a 15µl reaction and 3µl was saved for subsequent TA cloning using the standard TOPO TA cloning protocol (ThermoFisher K4500J10). The remaining volume was run on a 1% agarose gel to confirm that there is a single PCR product. Bisulfite primers were optimized on bisulfite converted DNA using 12 different conditions, including 4 different concentrations of MgCl<sub>2</sub> (1.5mM, 2.5mM,

3.5mM and 4.5mM) paired with 3 different concentrations of DMSO (0%, 1.5% and 5%). In addition, primers were optimized across a temperature gradient. Primer sets, polymorphisms, and optimal PCR conditions for each gene are listed in the individual figures. Of note, because of the difficulty in finding primer sequences in highly CpG rich regions that do not contain a CpG dinucleotide, many of the primers contained suboptimal base composition and/or did not match the annealing temperature of the other primer used in the reaction. As a result, several of the optimized PCR protocols contain relatively large numbers of cycles to enable the amplification of a product. The BiQ Analyzer program was used for the analysis of bisulfite converted sequences. During the bisulfite analysis, depending on the choice of primers, two different DNA strands will lead to two different sequencing results. Some of the genes we report here were surveyed on the opposite strand of the gene assembly and therefore have a reversed order of their SNPs compared to the databases. These genes are shown with their chromosome location number in reverse order from high to low and this is noted in the corresponding figure legend.

## **Data Availability**

All data and reagents are available upon request.

## **Results**

In order to begin the process of interrogating specific imprinted loci, we generated a workflow to streamline the process (Figure 1). Our first criterion was to identify well-defined imprinting control regions (ICRs) that have been extensively studied. We focused on the following ICRs due to their prevalence in the literature:

*Grb10, H19, Igf2r, Impact, Lit1/ Kcnq1ot1, Mest/Peg1, Peg3, Peg10, Snrpn, and Zac1/Plagl1.* These ICRs also had well-defined locations in the genome and are associated with differentially methylated regions that allowed us to probe their methylation status via bisulfite analysis. We then utilized the UCSC Genome Browser in conjunction with dbSNP to determine reported SNPs within a 10kb window surrounding and including the ICRs, and these SNPs were then crosschecked against the European database, as well as the Sanger database to determine their presence in specific strain backgrounds. Following this *in silico* analysis, we designed bisulfite specific primers to the regions of interest (Table S1). These regions were under 1kb and were within our 10kb defined window, including a significant portion of the ICR and at least one SNP. The bisulfite primers could not contain any CpG dinucleotides, reducing the availability of genomic regions to amplify. Bisulfite primers were optimized on bisulfite converted DNA (detailed in Methods). After optimization, bisulfite PCR was performed on a B6 female and a CAST male, along with the hybrid progeny resulting from the mating. Reported SNPs were compared in B6 and CAST sequences. If validated in this initial comparison, further validation was performed via analysis of the methylation status in hybrid B6/CAST progeny.

Using this workflow, we validated SNPs in all ten ICRs and identified PCR conditions for the analysis of each. The relevant details are reported for each gene below.

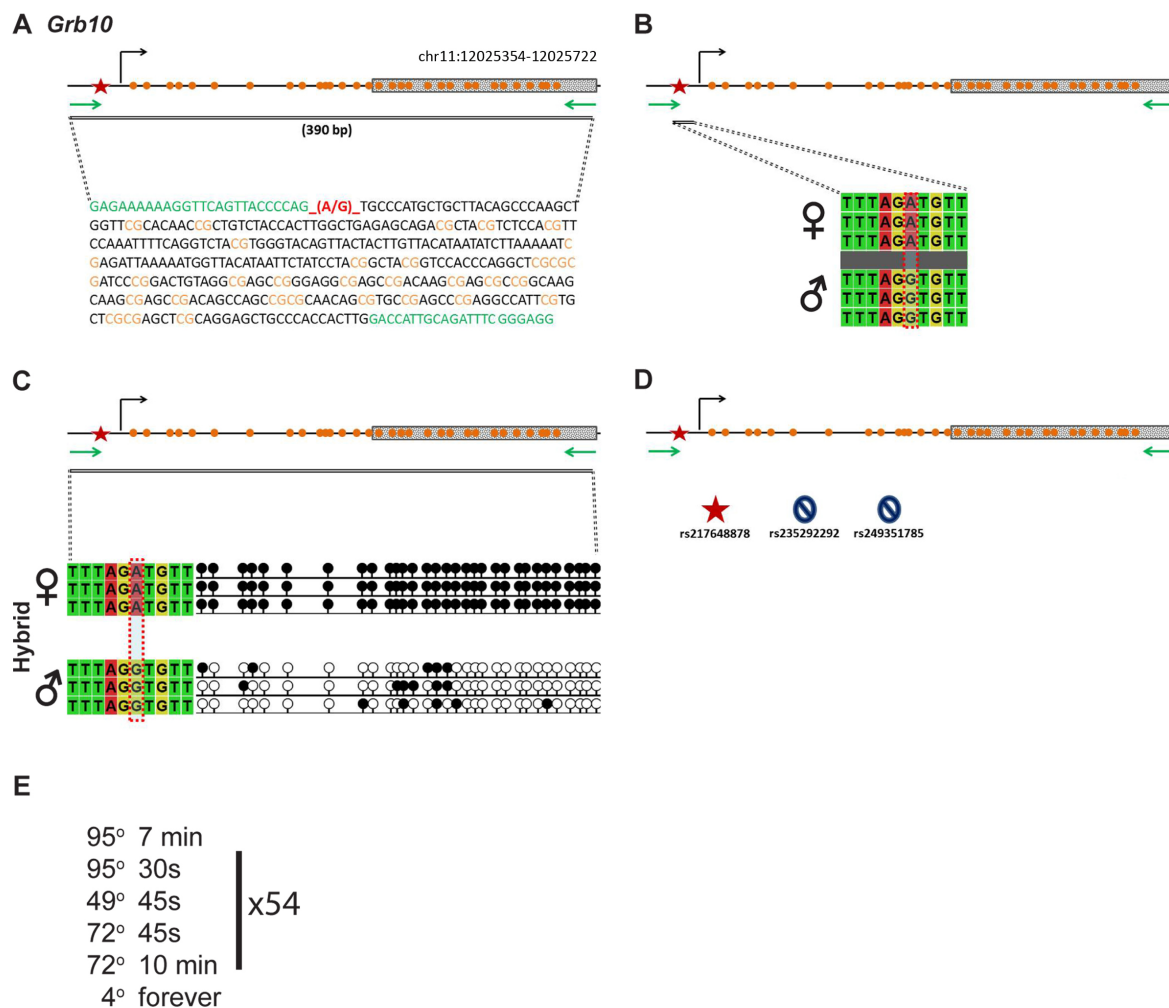

**Figure 2: SNP verification within *Grb10* ICR**

**A.** Schematic of *Grb10* imprinting control region. Probed region is highlighted by double-dashed line with number of base pairs covered reported. CpG island indicated by dotted box. Green indicates primer sequences; orange indicates CpG dinucleotides; red star and bases indicate verified SNP. **B.** Verified SNP presented as sequences from B6 female and CAST male. A-to-G SNP is highlighted by red dotted rectangle. **C.** Verification of proper imprinted status in hybrid B6/CAST progeny. SNP highlighted by red dotted rectangle. DNA methylation presented as lollipop diagram; white circles indicate unmethylated cytosines; black circles indicate methylated cytosines. **D.** Other SNPs reported in all three databases within the probed region with the SNP highlighted by red dotted rectangle. dbSNP identification number indicated under each SNP. Red star indicates validated SNP and blue closed circle indicates C-to-T polymorphism that cannot be assayed in bisulfite analysis. **E.** Optimal PCR conditions for probed region with the given primers.

158

159 *Grb10*

*Grb10* is regulated by an ICR that is approximately 1.4kb and located on chromosome 11 in mouse (Figure 2A). Within our probed region, we validated one SNP out of three reported SNPs from the dbSNP database (Figure 2D). The validated SNP is within a 390bp region containing 31 CpG residues (Figure 2A), with the polymorphic base being an A in the B6 background and a G in the Castaneus background (Figure 2B). *Grb10* is methylated on the maternal allele and unmethylated on the paternal allele. This methylation pattern was correctly observed in the hybrid progeny using our optimized assay (Figure 2C and 2E).

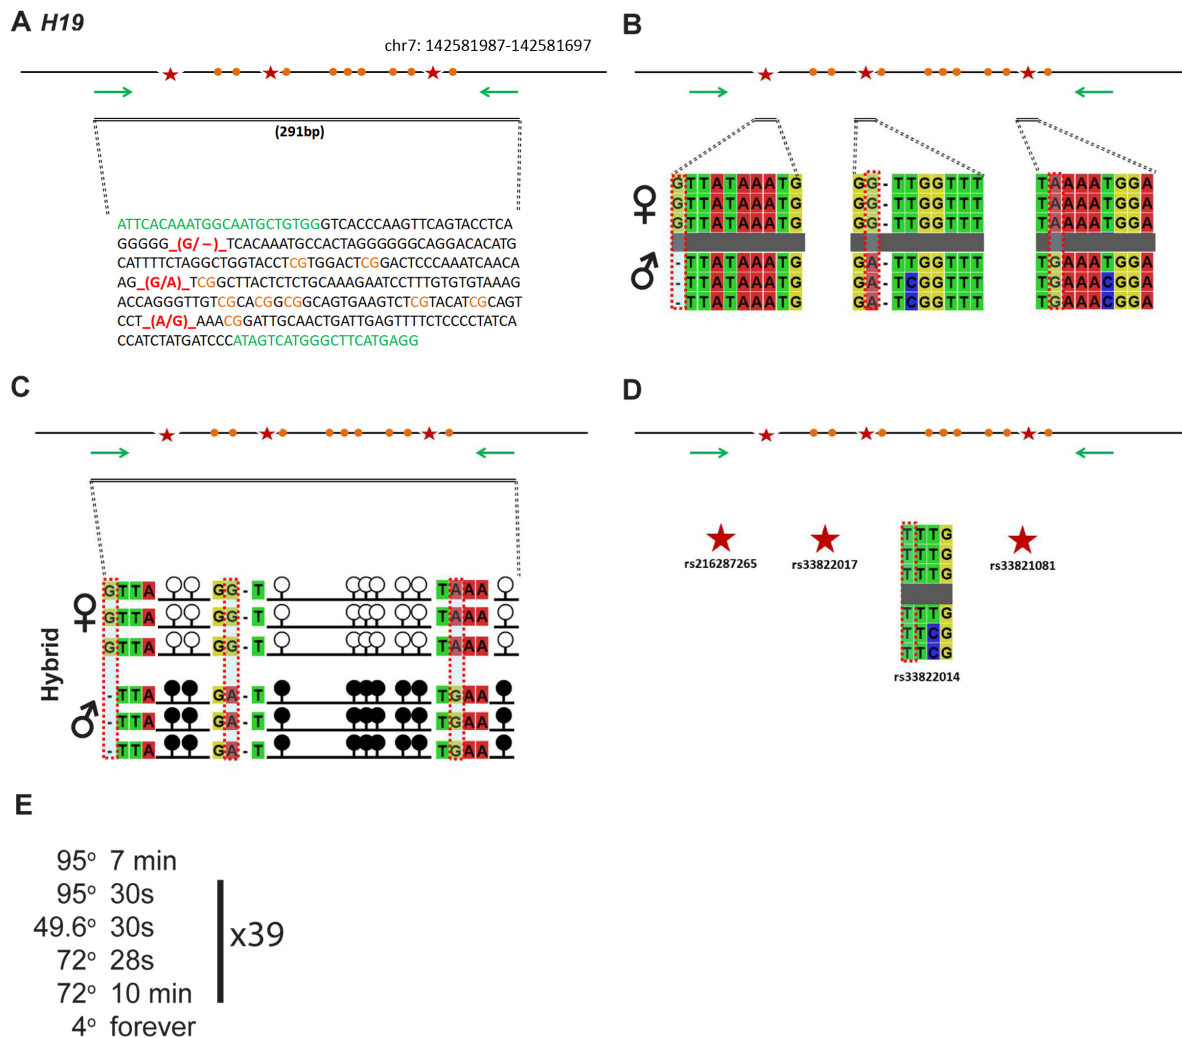

**Figure 3: SNP verification within H19 ICR**

**A.** Schematic of H19 imprinting control region. Probed region is highlighted by double-dashed line with number of base pairs covered reported. CpG island indicated by dotted box. Green indicates primer sequences; orange indicates CpG dinucleotides; red star and bases indicate verified SNPs. The chromosome location is from high to low, see Methods for more details. **B.** Verified SNPs presented as sequences from B6 female and CAST male. G-to-del, G-to-A, and A-to-G SNPs are highlighted by red dotted rectangle. **C.** Verification of proper imprinted status in hybrid B6/CAST progeny. SNPs highlighted by red dotted rectangle. DNA methylation presented as lollipop diagram; white circles indicate unmethylated cytosines; black circles indicate methylated cytosines. **D.** Other SNPs reported in all three databases within the probed region with the SNP highlighted by red dotted rectangle. dbSNP identification number indicated under each SNP. Red star indicates validated SNP and blue closed circle indicates C-to-T polymorphism that cannot be assayed in bisulfite analysis. **E.** Optimal PCR conditions for probed region with the given primers.

169

170 **H19**

*H19* is regulated by an ICR on chromosome 7 (Figure 3A). Within our probed region, we validated three SNPs out of four reported SNPs from the dbSNP database (Figure 3D). These validated SNPs are within a 291bp region containing 9 CpG residues (Figure 3A). The three validated SNPs include (1) a G in the B6 background and a deletion in the Castaneus background, (2) a G in the B6 background and an A in the Castaneus background, and (3) an A in the B6 background and a G in the Castaneus background (Figure 3B). *H19* is methylated on the paternal allele and unmethylated on the maternal allele. This methylation pattern was correctly observed in the hybrid progeny using our optimized assay (Figure 3C and 3E).



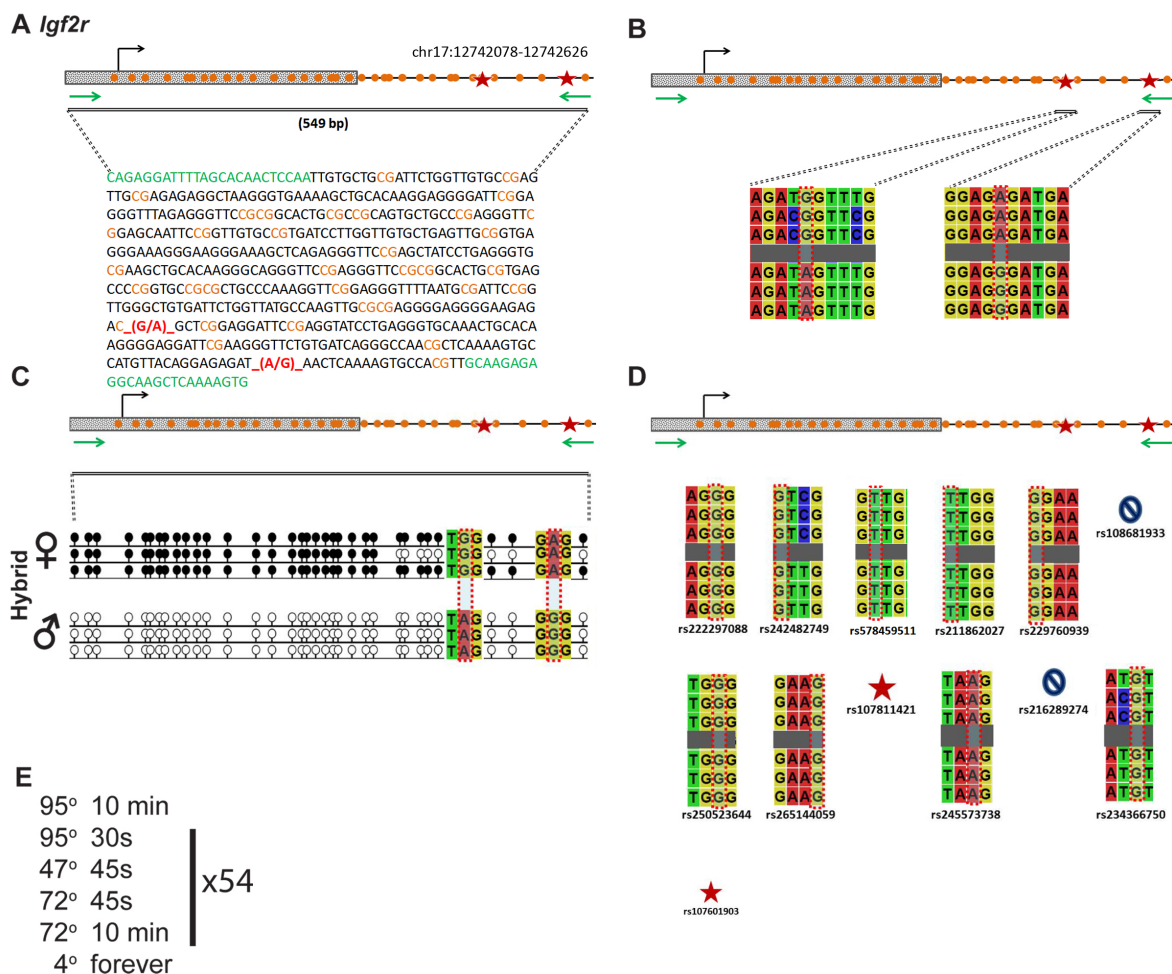

**Figure 4: SNP verification within *Igf2r* ICR**

**A.** Schematic of *Igf2r* imprinting control region. Probed region is highlighted by double-dashed line with number of base pairs covered reported. CpG island indicated by dotted box. Green indicates primer sequences; orange indicates CpG dinucleotides; red star and bases indicate verified SNPs. **B.** Verified SNPs presented as sequences from B6 female and CAST male. G-to-A and A-to-G SNPs are highlighted by red dotted rectangle. **C.** Verification of proper imprinted status in hybrid B6/CAST progeny. SNPs highlighted by red dotted rectangle. DNA methylation presented as lollipop diagram; white circles indicate unmethylated cytosines; black circles indicate methylated cytosines. **D.** Other SNPs reported in all three databases within the probed region with the SNP highlighted by red dotted rectangle. dbSNP identification number indicated under each SNP. Red star indicates validated SNP and blue closed circle indicates C-to-T polymorphism that cannot be assayed in bisulfite analysis. **E.** Optimal PCR conditions for probed region with the given primers.

181

182 *Igf2r*



183 *Igf2r* is regulated by an ICR on chromosome 17 (Figure 4A). Within our probed region,  
 184 we validated two SNPs out of 13 reported SNPs from the dbSNP database (Figure 4D).  
 185 These validated SNPs are within a 549bp region containing 33 CpG residues (Figure  
 186 4A). These polymorphic bases include (1) a G in the B6 background and an A in the  
 187 Castaneus background, and (2) an A in the B6 background and a G in the Castaneus  
 188 background (Figure 4B). *Igf2r* is methylated on the maternal allele and unmethylated on  
 189 the paternal allele. This methylation pattern was correctly observed in the hybrid  
 190 progeny using our optimized assay (Figure 4C and 4E).

191

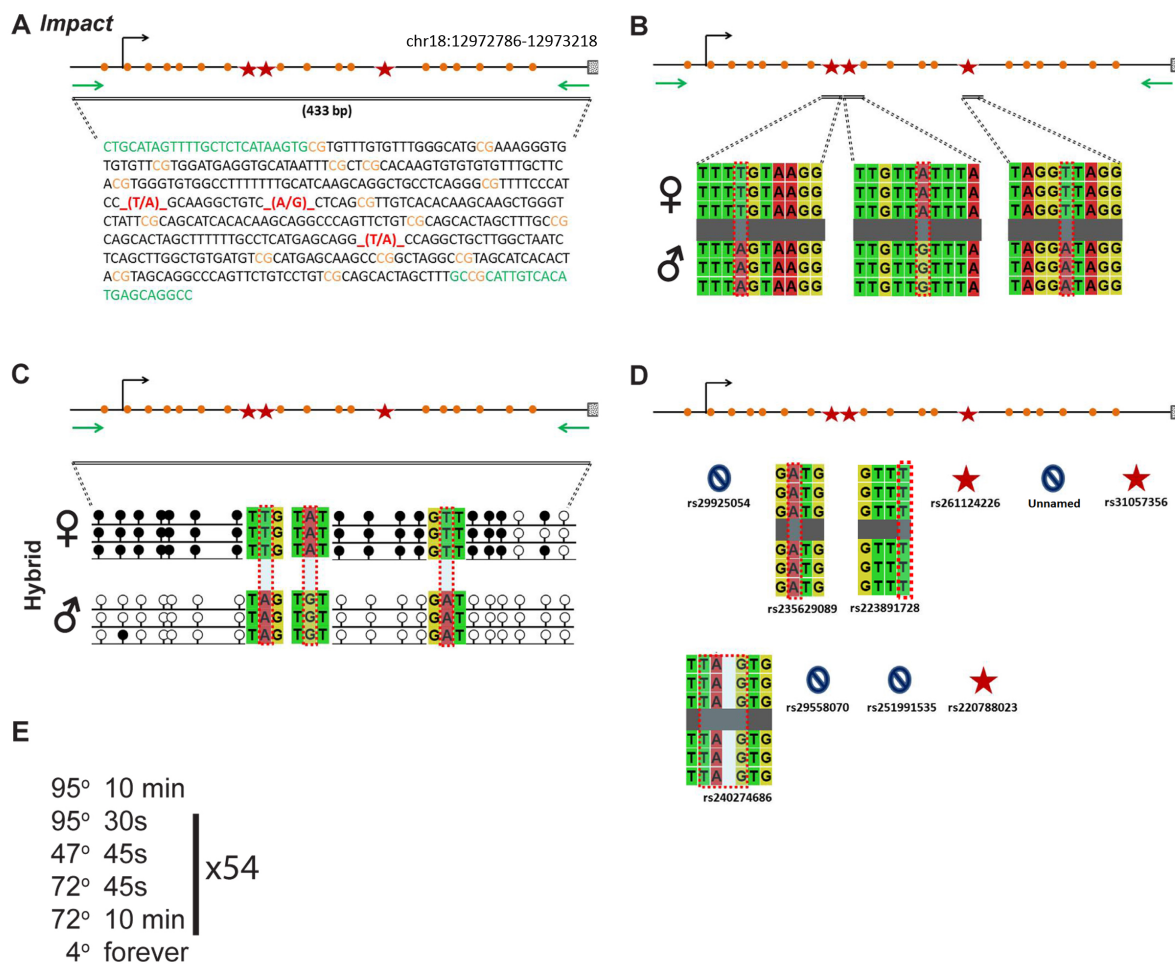

**Figure 5: SNP verification within *Impact* ICR**

**A.** Schematic of *Impact* imprinting control region. Probed region is highlighted by double-dashed line with number of base pairs covered reported. CpG island indicated by dotted box. Green indicates primer sequences; orange indicates CpG dinucleotides; red star and bases indicate verified SNPs. **B.** Verified SNPs presented as sequences from B6 female and CAST male. T-to-A, A-to-G, and T-to-A SNPs are highlighted by red dotted rectangle. **C.** Verification of proper imprinted status in hybrid B6/CAST progeny. SNPs highlighted by red dotted rectangle. DNA methylation presented as lollipop diagram; white circles indicate unmethylated cytosines; black circles indicate methylated cytosines. **D.** Other SNPs reported in all three databases within the probed region with the SNP highlighted by red dotted rectangle. dbSNP identification number indicated under each SNP. Red star indicates validated SNP and blue closed circle indicates C-to-T polymorphism that cannot be assayed in bisulfite analysis. **E.** Optimal PCR conditions for probed region with the given primers.

194 *Impact* is regulated by an ICR on chromosome 18 (Figure 5A). Within our probed  
 195 region, we validated three SNPs out of 10 reported SNPs from the dbSNP and  
 196 European databases (Figure 5D). One of the SNPs that was not validated was an  
 197 unnamed SNP from the European database. The validated SNPs are within a 433bp  
 198 region that contains 17 CpG residues (Figure 5A). These polymorphic bases include (1)  
 199 a T in the B6 background and an A in the Castaneus background, (2) an A in the B6  
 200 background and a G in the Castaneus background, and (3) a T in the B6 background  
 201 and an A in the Castaneus background (Figure 5B). *Impact* is methylated on the  
 202 maternal allele and unmethylated on the paternal allele. This methylation pattern was  
 203 correctly observed in the hybrid progeny using our optimized assay (Figure 5C and 5E).  
 204

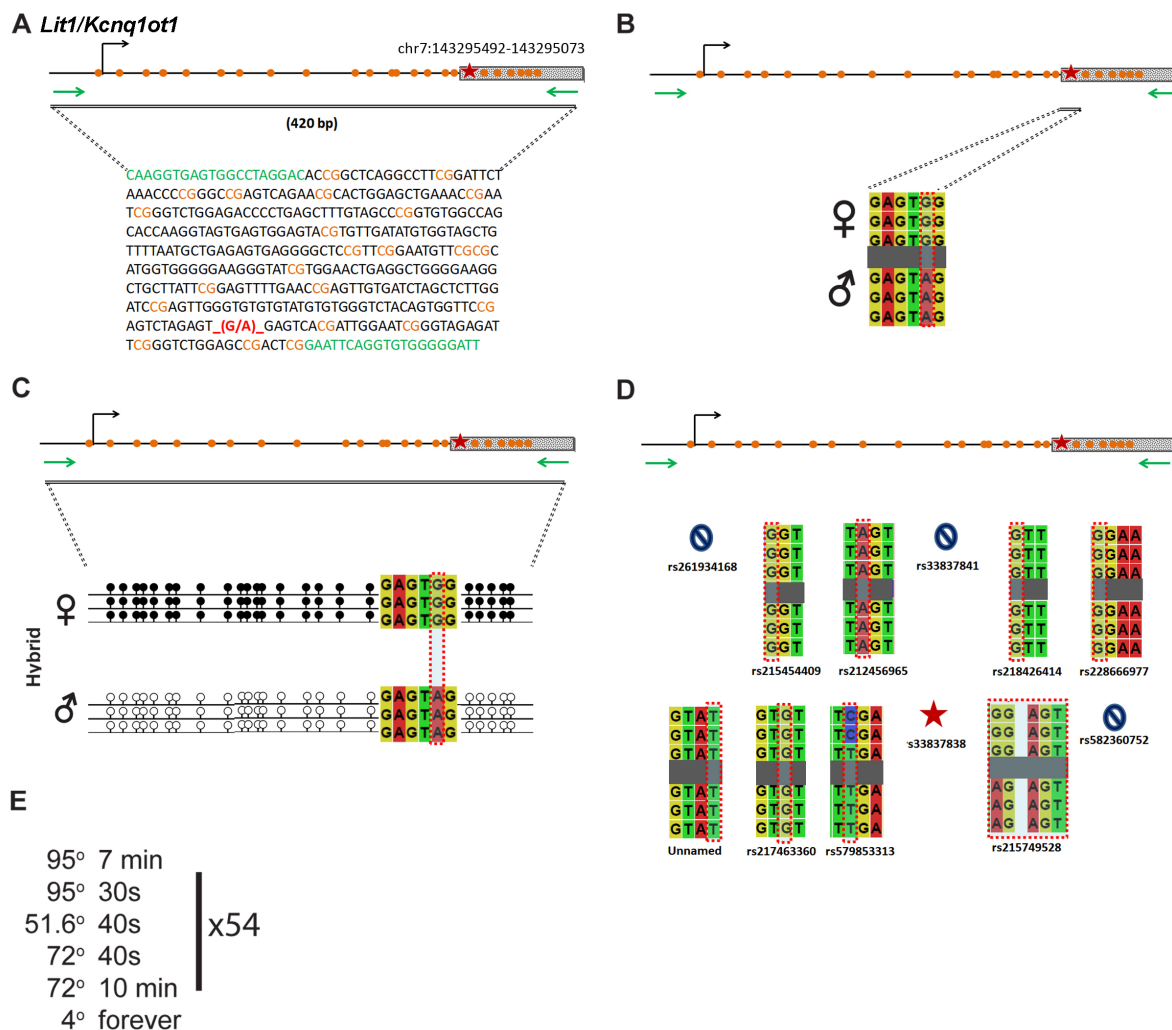

**Figure 6: SNP verification within *Lit1/Kcnq1ot1* ICR**

**A.** Schematic of *Lit1/Kcnq1ot1* imprinting control region. Probed region is highlighted by double-dashed line with number of base pairs covered reported. CpG island indicated by dotted box. Green indicates primer sequences; orange indicates CpG dinucleotides; red star and bases indicate verified SNP. The chromosome location is from high to low, see Methods for more details. **B.** Verified SNP presented as sequences from B6 female and CAST male. G-to-A SNP is highlighted by red dotted rectangle. **C.** Verification of proper imprinted status in hybrid B6/CAST progeny. SNP highlighted by red dotted rectangle. DNA methylation presented as lollipop diagram; white circles indicate unmethylated cytosines; black circles indicate methylated cytosines. **D.** Other SNPs reported in all three databases within the probed region with the SNP highlighted by red dotted rectangle. dbSNP identification number indicated under each SNP. Red star indicates validated SNP and blue closed circle indicates C-to-T polymorphism that cannot be assayed in bisulfite analysis. **E.** Optimal PCR conditions for probed region with the given primers.

205

206 *Lit1/Kcnq1ot1*

207 *Lit1/Kcnq1ot1* is regulated by an ICR on chromosome 7 (Figure 6A). Within our probed  
 208 region, we validated one SNP out of 12 reported SNPs from the dbSNP and European  
 209 databases (Figure 6D). One of the SNPs that was not validated was an unnamed SNP  
 210 from the European database. The validated SNP is within a 420bp region that contains  
 211 17 CpG residues (Figure 6A). The polymorphic base is a G in the B6 background and  
 212 an A in the Castaneus background (Figure 6B). *Lit1* is methylated on the maternal allele  
 213 and unmethylated on the paternal allele. This methylation pattern was correctly  
 214 observed in the hybrid progeny using our optimized assay (Figure 6C and 6E).  
 215

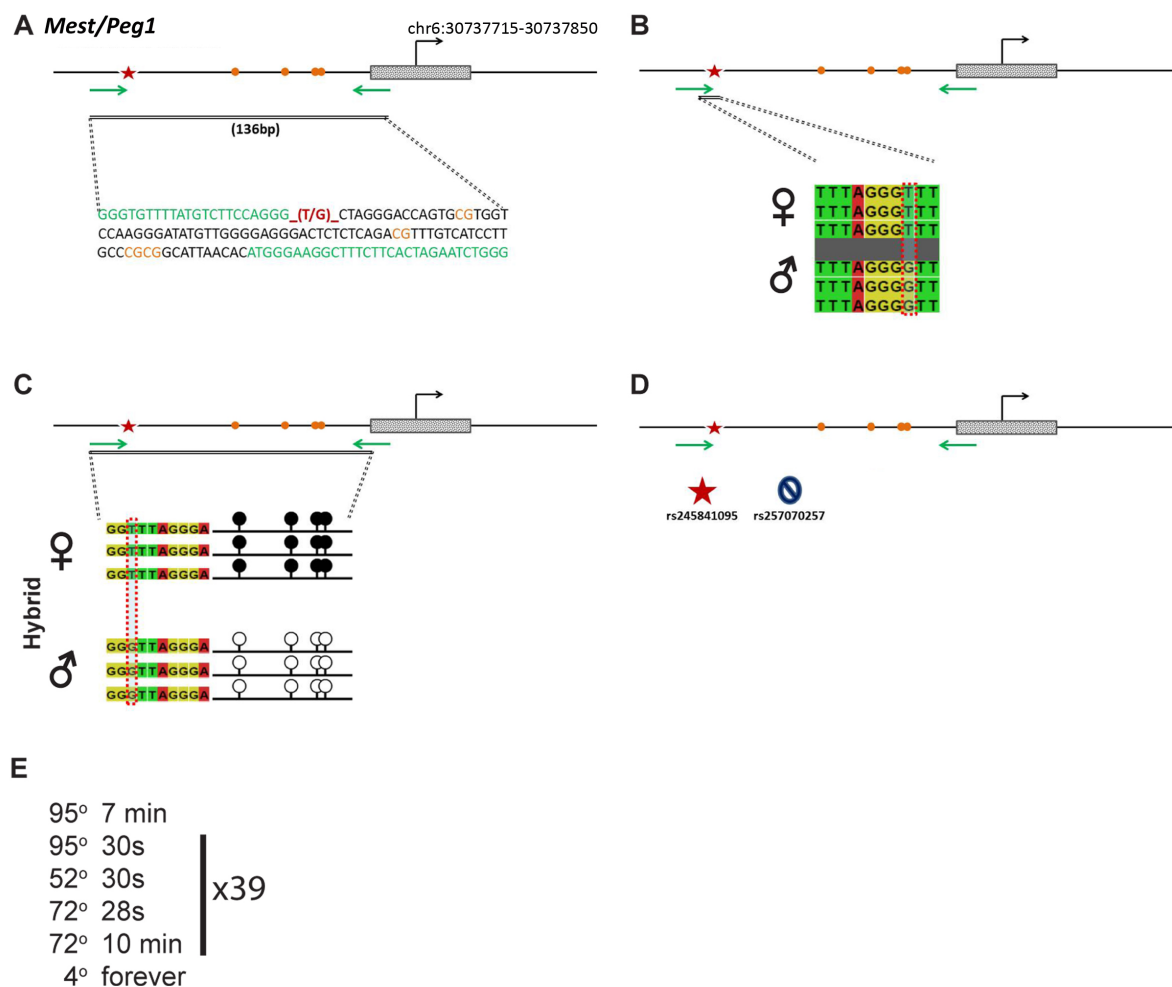

**Figure 7: SNP verification within *Mest/Peg1* ICR**

**A.** Schematic of *Mest/Peg1* imprinting control region. Probed region is highlighted by double-dashed line with number of base pairs covered reported. CpG island indicated by dotted box. Green indicates primer sequences; orange indicates CpG dinucleotides; red star and bases indicate verified SNP. **B.** Verified SNP presented as sequences from B6 female and CAST male. T-to-G SNP is highlighted by red dotted rectangle. **C.** Verification of proper imprinted status in hybrid B6/CAST progeny. SNP highlighted by red dotted rectangle. DNA methylation presented as lollipop diagram; white circles indicate unmethylated cytosines; black circles indicate methylated cytosines. **D.** Other SNPs reported in all three databases within the probed region with the SNP highlighted by red dotted rectangle. dbSNP identification number indicated under each SNP. Red star indicates validated SNP and blue closed circle indicates C-to-T polymorphism that cannot be assayed in bisulfite analysis. **E.** Optimal PCR conditions for probed region with the given primers.

218 *Mest/Peg1* is regulated by an ICR on chromosome 6 (Figure 7A). Within our probed  
 219 region, we validated one SNP out of two reported SNPs from the dbSNP database  
 220 (Figure 7D). This validated SNP is within a 136bp region that contains 4 CpG residues  
 221 (Figure 7A). This polymorphic base is a T in the B6 background and a G in the  
 222 Castaneus background (Figure 7B). *Mest* is methylated on the maternal allele and  
 223 unmethylated on the paternal allele. This methylation pattern was correctly observed in  
 224 the hybrid progeny using our optimized assay (Figure 7C and 7E).

225



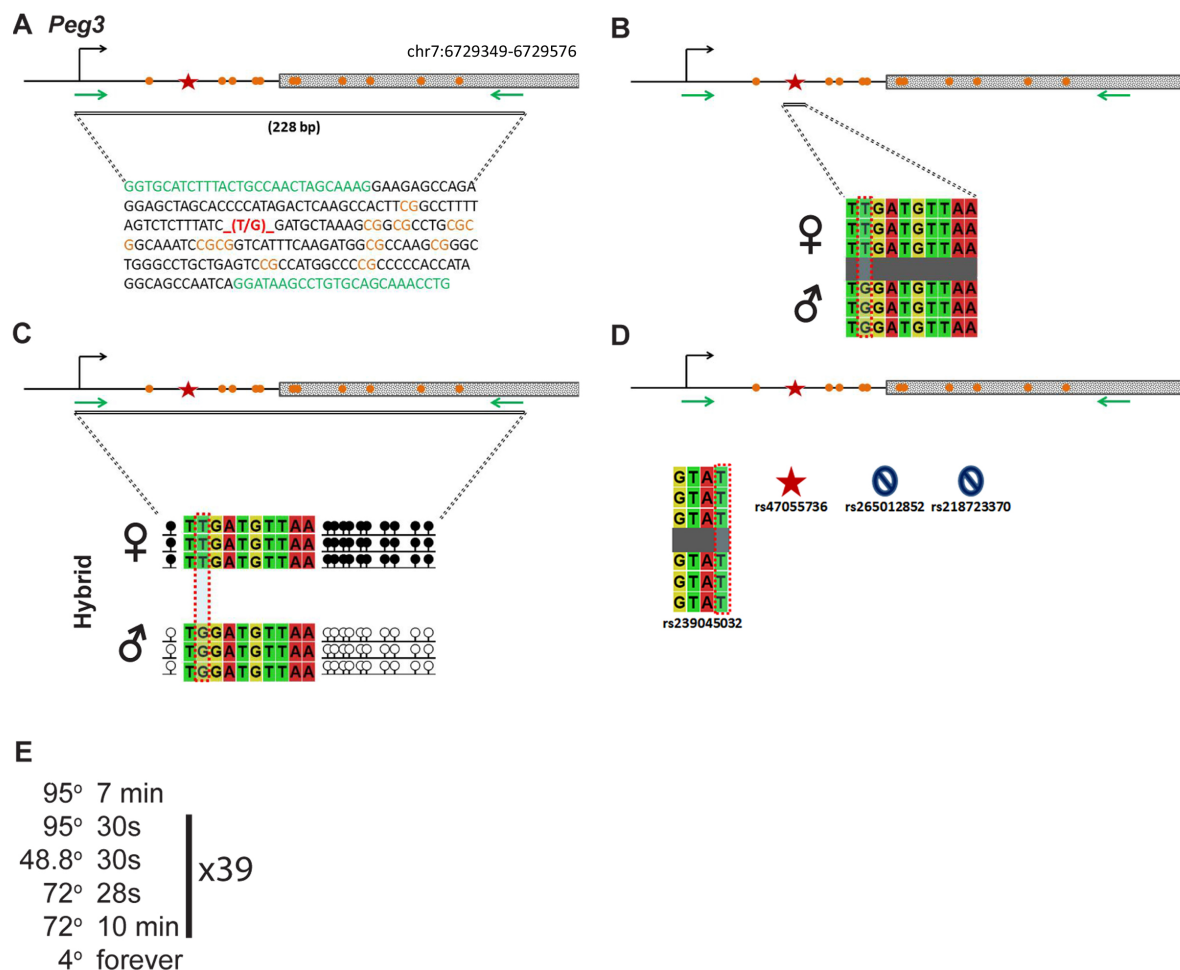

**Figure 8: SNP verification within *Peg3* ICR**

**A.** Schematic of *Peg3* imprinting control region. Probed region is highlighted by double-dashed line with number of base pairs covered reported. CpG island indicated by dotted box. Green indicates primer sequences; orange indicates CpG dinucleotides; red star and bases indicate verified SNP. **B.** Verified SNP presented as sequences from B6 female and CAST male. T-to-G SNP is highlighted by red dotted rectangle. **C.** Verification of proper imprinted status in hybrid B6/CAST progeny. SNP highlighted by red dotted rectangle. DNA methylation presented as lollipop diagram; white circles indicate unmethylated cytosines; black circles indicate methylated cytosines. **D.** Other SNPs reported in all three databases within the probed region with the SNP highlighted by red dotted rectangle. dbSNP identification number indicated under each SNP. Red star indicates validated SNP and blue closed circle indicates C-to-T polymorphism that cannot be assayed in bisulfite analysis. **E.** Optimal PCR conditions for probed region with the given primers.

226

227 ***Peg3***



228 *Peg3* is regulated by an ICR on chromosome 7 (Figure 8A). Within our probed region,  
 229 we validated one SNP out of four reported SNPs from the dbSNP database (Figure 8D).  
 230 This validated SNP is within a 228bp region that contains 11 CpG residues (Figure 8A).  
 231 This polymorphic base is a T in the B6 background and a G in the Castaneus  
 232 background (Figure 8B). *Peg3* is methylated on the maternal allele and unmethylated  
 233 on the paternal allele. This methylation pattern was correctly observed in the hybrid  
 234 progeny using our optimized assay (Figure 8C and 8E).

235

**Figure 9: SNP verification within *Peg10* ICR**

**A.** Schematic of *Peg10* imprinting control region. Probed region is highlighted by double-dashed line with number of base pairs covered reported. CpG island indicated by dotted box. Green indicates primer sequences; orange indicates CpG dinucleotides; red star and bases indicate verified SNP. **B.** Verified SNP presented as sequences from B6 female and CAST male. C-to-A SNP is highlighted by red dotted rectangle. **C.** Verification of proper imprinted status in hybrid B6/CAST progeny. SNP highlighted by red dotted rectangle. DNA methylation presented as lollipop diagram; white circles indicate unmethylated cytosines; black circles indicate methylated cytosines. **D.** Other SNPs reported in all three databases within the probed region with the SNP highlighted by red dotted rectangle. dbSNP identification number indicated under each SNP. Red star indicates validated SNP and blue closed circle indicates C-to-T polymorphism that cannot be assayed in bisulfite analysis. **E.** Optimal PCR conditions for probed region with the given primers.

238 *Peg10* is regulated by an ICR on chromosome 6 (Figure 9A). Within our probed region,  
 239 we validated one SNP out of 23 reported SNPs from the dbSNP and European  
 240 databases (Figure 9D). One of the SNPs that was not validated was an unnamed SNP  
 241 from the European database. The validated SNP is within a 663bp region that contains  
 242 54 CpG residues (Figure 9A). This polymorphic base is a C in the B6 background and  
 243 an A in the Castaneus background (Figure 9B). *Peg10* is methylated on the maternal  
 244 allele and unmethylated on the paternal allele. This methylation pattern was correctly  
 245 observed in the hybrid progeny using our optimized assay (Figure 9C and 9E).  
 246

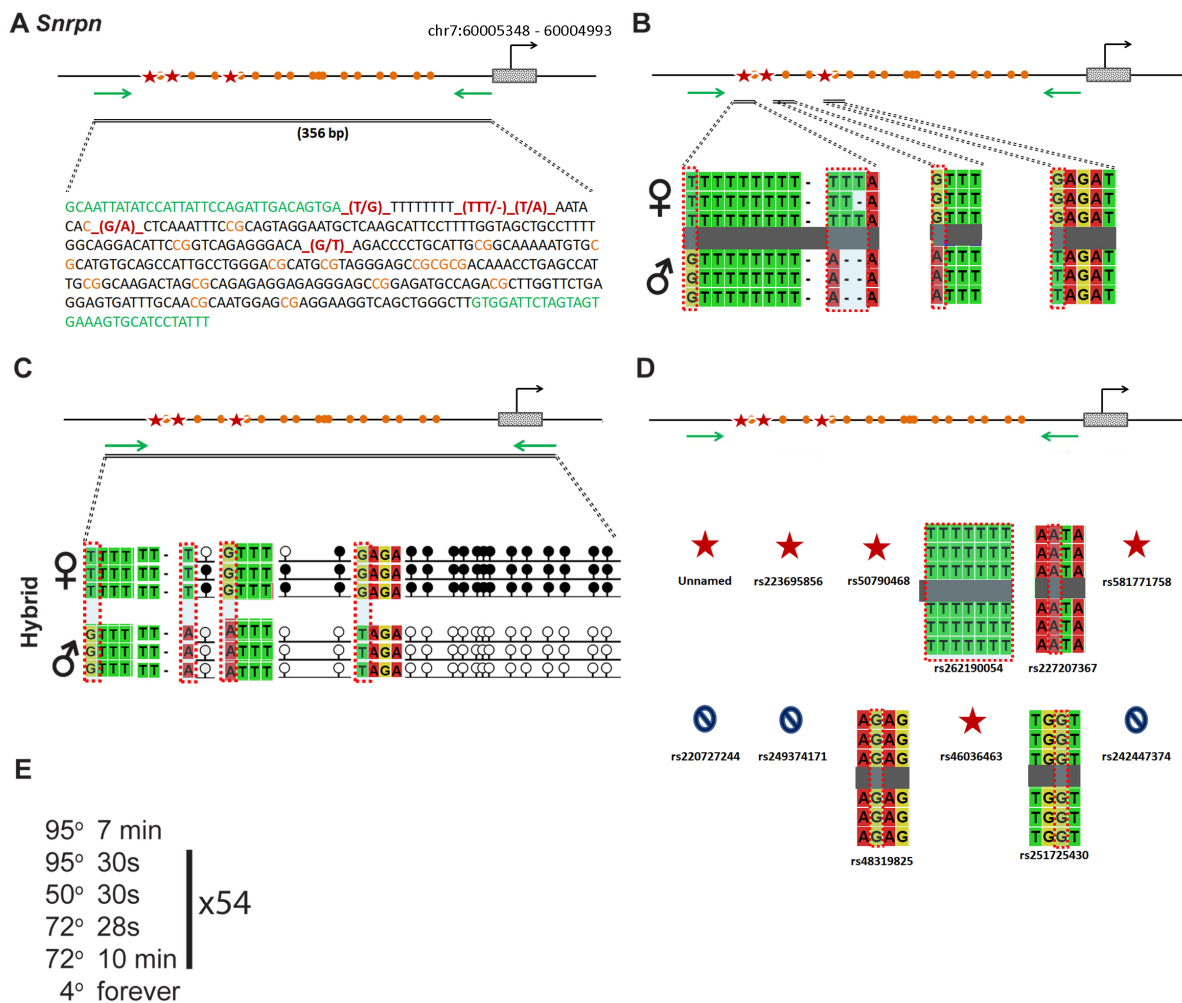

**Figure 10: SNP verification within *Snrpn* ICR**

**A.** Schematic of *Snrpn* imprinting control region. Probed region is highlighted by double-dashed line with number of base pairs covered reported. CpG island indicated by dotted box. Green indicates primer sequences; orange indicates CpG dinucleotides; red star and bases indicate verified SNPs. The chromosome location is from high to low, see Methods for more details. **B.** Verified SNPs presented as sequences from B6 female and CAST male. T-to-G, TTT-to-Del, T-to-A, G-to-A, and G-to-T SNPs are highlighted by red dotted rectangle. **C.** Verification of proper imprinted status in hybrid B6/CAST progeny. SNP highlighted by red dotted rectangle. DNA methylation presented as lollipop diagram; white circles indicate unmethylated cytosines; black circles indicate methylated cytosines. **D.** Other SNPs reported in all three databases within the probed region with the SNP highlighted by red dotted rectangle. dbSNP identification number indicated under each SNP. Red star indicates validated SNP and blue closed circle indicates C-to-T polymorphism that cannot be assayed in bisulfite analysis. **E.** Optimal PCR conditions for probed region with the given primers.

247

248 ***Snrpn***

95° 7 min  
95° 30s  
50° 30s  
72° 28s  
72° 10 min  
4° forever

x54

*Snrpn* is regulated by an ICR on chromosome 7 (Figure 10A). Within our probed region, we validated four SNPs out of 11 reported SNPs from the dbSNP database (Figure 10D). We also identified a novel SNP that is not present in any of the three databases. All five of the validated SNPs are within a 356bp region that contains 16 CpG residues (Figure 10A). These polymorphic bases include (1) a T in the B6 background and an G in the Castaneus background. This is the novel SNP that we identified. (2) a TTT in the B6 background and a deletion in the Castaneus background, (3) a T in the B6 background and an A in the Castaneus background, (4) a G in the B6 background and an A in the Castaneus background, and (5) a G in the B6 background and a T in the Castaneus background (Figure 10B). *Snrpn* is methylated on the maternal allele and unmethylated on the paternal allele. This methylation pattern was correctly observed in the hybrid progeny using our optimized assay (Figure 10C and 10E).

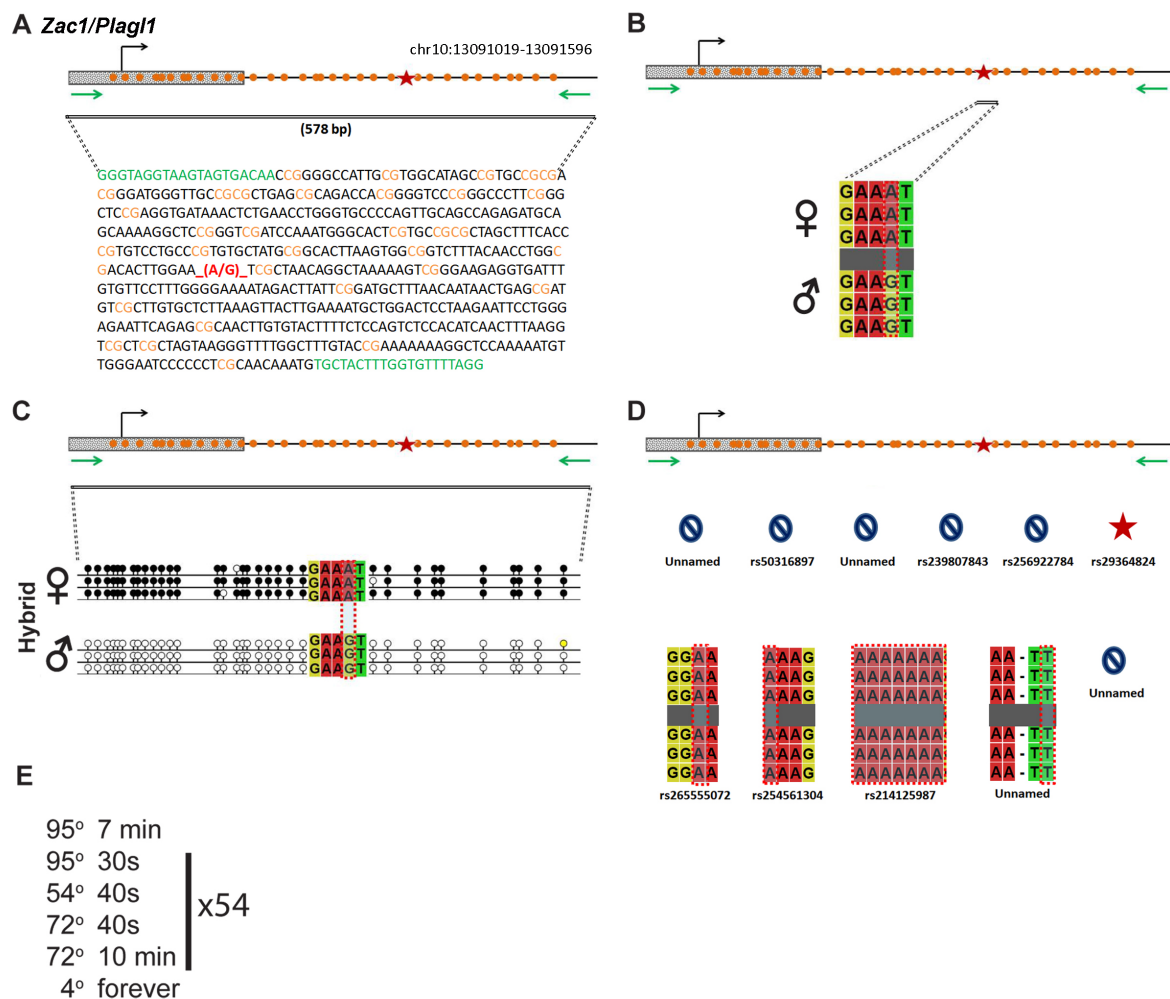

**Figure 11: SNP verification within *Zac1/Plagl1* ICR**

**A.** Schematic of *Zac1/Plagl1* imprinting control region. Probed region is highlighted by double-dashed line with number of base pairs covered reported. CpG island indicated by dotted box. Green indicates primer sequences; orange indicates CpG dinucleotides; red star and bases indicate verified SNP. **B.** Verified SNP presented as sequences from B6 female and CAST male. A-to-G SNP is highlighted by red dotted rectangle. **C.** Verification of proper imprinted status in hybrid B6/CAST progeny. SNP highlighted by red dotted rectangle. DNA methylation presented as lollipop diagram; white circles indicate unmethylated cytosines; black circles indicate methylated cytosines. **D.** Other SNPs reported in all three databases within the probed region with the SNP highlighted by red dotted rectangle. dbSNP identification number indicated under each SNP. Red star indicates validated SNP and blue closed circle indicates C-to-T polymorphism that cannot be assayed in bisulfite analysis. **E.** Optimal PCR conditions for probed region with the given primers.

263

264 ***Zac1/Plagl1***



*Zac1/Plagl1* is regulated by an ICR on chromosome 10 (Figure 11A). Within our probed region, we validated one SNP out of 11 reported SNPs from the dbSNP and European databases (Figure 11D). The unnamed SNPs are not found in the dbSNP. The validated SNP is within a 578bp region that contains 33 CpG residues (Figure 11A). This polymorphic base is an A in the B6 background and a G in the Castaneus background (Figure 11B). *Zac1* is methylated on the maternal allele and unmethylated on the paternal allele. This methylation pattern was correctly observed in the hybrid progeny using our optimized assay (Figure 11C and 11E).

## Summary of work

Of the SNPs that we analyzed we were able to validate 18, while we failed to validate 75 SNPs within those same regions (Table 1, red). In addition, a further 28 of them were C/T polymorphisms that bisulfite analysis was unable to differentiate (Table 1, blue). We also identified a SNP in the *Snrpn* ICR, which was not present in any of the three databases (Table 1, orange). Furthermore, during our optimization we failed to validate multiple SNPs that lie outside of our bisulfite primers. These SNPs are reported in Figure S1. Among the many SNPs reported in the dbSNP database that we failed to verify, most were identified as SNPs between strains other than CAST in the Sanger database. In the end, we could only find one SNP that was supposed to show a polymorphism based on the reported data but did not in our experiments (Table 1, purple). Thus, in general, we recommend using the Sanger database. However, it is important to note that since the Sanger database primarily contains SNPs located close or within genes, certain ICR SNPs had to be identified in the dbSNP database.

In this resource, we have validated a number of SNPs within the ICRs of the most commonly imprinted loci. In addition, we have demonstrated a high frequency of invalid SNPs within ICRs when the pooled SNPs from the dbSNP (European variation archive) are used alone, highlighting the drawbacks of the mixed strain databases compared to the Sanger strain specific polymorphism database. Using the validated SNPs, we have optimized allele-specific DNA methylation assays that will allow for the rapid analysis of multiple imprinted loci in a variety of contexts, including at several ICRs that are not contained within the Sanger database. This resource will enable the systematic analysis of multiple imprinted genes in a number of potential applications.

## Potential applications

As this resource offers extensive and straight-forward assays to interrogate the most commonly studied imprinted loci, it can be utilized across a number of fields. There are two major instances where we envision the utility of this resource. First, cases where a regulatory mechanism directly interacts with multiple imprinted loci. Second, cases where a mechanism either indirectly regulates many imprinted loci, or affects multiple imprinted loci by generally disrupting the epigenetic landscape.

Recently, a number of proteins have been demonstrated to directly regulate multiple imprinted loci. These include, but are not limited to, *Dnmt3l*, *Dnmt1*, *Lsd2*, *Trim28*, *Zfp57*, and *Tet1/2*, each with a different mechanism of action (Bourc'his *et al.* 2001; Howell *et al.* 2001; Reik *et al.* 2003; Li *et al.* 2008a; Karytinis *et al.* 2009; Fang *et al.* 2010; Messerschmidt *et al.* 2012; Yamaguchi *et al.* 2013; Canovas and Ross 2016). For example, deletion of the regulatory subunit of the *de novo* DNA methyltransferase



*Dnmt3L* results in the failure to establish maternal DNA methylation at a number of maternally imprinted loci, including *Peg3*, *Lit1/Kcnq1ot1* and *Snrpn* (Bourc'his *et al.* 2001; Hata *et al.* 2002). Another maternal effect enzyme required for the establishment of DNA methylation at maternally imprinted loci is the histone demethylase *Lsd2*. Mechanistically, *Lsd2* is required to remove H3K4 methylation in order to get proper DNA methylation at imprinted loci including *Mest*, *Grb10*, and *Zac1* (Ciccone *et al.* 2009; Lei *et al.* 2009; Fang *et al.* 2010; Zhang *et al.* 2012; Stewart *et al.* 2015). Furthermore, *Zfp57*, a KRAB domain zinc-finger protein, is required both maternally and zygotically to maintain the imprinting status of various imprinted loci including *Snrpn* (Li *et al.* 2008a; Strogantsev and Ferguson-smith 2012; Strogantsev *et al.* 2015). This protein is thought to bind directly to DNA with its zinc fingers and subsequently recruit factors that repress transcription (Li *et al.* 2008b; Quenneville *et al.* 2011; Strogantsev *et al.* 2015). These studies demonstrate how disruptions in mechanistically distinct regulatory mechanisms can affect multiple imprinted loci.

Alternatively, a number of mechanisms have been demonstrated to indirectly affect imprinted loci via general epigenetic disruptions. For example, mutations in human NLRP genes, which are required maternally for the transition to zygotic gene expression, result in hydatidiform moles and loss of imprinting (Docherty *et al.* 2015). Another maternal effect gene, *Lsd1*, the homolog of *Lsd2*, is also maternally required at fertilization for the maternal to zygotic transition (Ancelin *et al.* 2016; Wasson *et al.* 2016). Loss of maternal *Lsd1* leads to a general disruption of DNA methylation in the resulting progeny at both maternally and paternally imprinted loci (Ancelin *et al.* 2016; Wasson *et al.* 2016). These studies demonstrate how maternal factors, deposited into

the zygote from the mother, are required for proper imprinting and development of the embryo.

As imprinting control regions are inherently asymmetric in their epigenetic modifications and opposing mechanisms are required at each parental ICR, even slight disturbances in the epigenetic landscape can lead to significant changes in expression at these loci. For example, disruptions in the maternal expression of *Grb10* results in developmental defects in mice, while disruption of the paternal allele of *Grb10* leads to changes in behavior, including increased social dominance (Garfield *et al.* 2011; Dent and Isles 2014). This highlights differences in the roles of imprinted parental alleles in mice. Another study that highlights the relative contributions of each parental allele describes parental specific duplications of the 15q11.2-q13.3 region of human chromosome 15 (Isles *et al.* 2016). Paternal duplications were more associated with autism spectrum disorder and developmental delay, while maternal duplications were more associated with psychiatric disorders (Isles *et al.* 2016). These studies demonstrate the complexity of outcomes associated with maternal versus paternal inheritance.

Finally, mechanisms that affect imprinted genes indirectly through general epigenetic disruptions highlight how the methylation status of ICRs can act as a proxy for global epigenetic alterations. For example, studies have demonstrated hypomethylation of a differentially methylated region in the *Igf2-H19* locus in Wilms tumor patients (Scharnhorst *et al.* 2001). In addition, embryos conceived using artificial reproductive technologies have higher incidences of Prader-Willi and Angelman Syndromes (Horsthemke and Wagstaff 2008; Buiting 2010; Butler 2011). These

syndromes are caused by large-scale chromosomal abnormalities that affect multiple imprinted loci (Horsthemke and Wagstaff 2008; Buiting 2010; Butler 2011). It is also possible that imprinting may be disrupted by environmental factors. For example, Bisphenol A (BPA), an environmental toxin, as well as various endocrine disruptors, have been revealed to significantly alter the epigenetic landscape (Kang *et al.* 2011; Susiarjo *et al.* 2013). Also Vinclozolin exposure in mice leads to infertility due to sperm defects in mice which correlate with global alterations in the DNA methylation landscape (Anway *et al.* 2005; Kang *et al.* 2011). These studies demonstrate additional mechanisms that may lead to broad imprinting disruptions.

Due to various mechanisms that can disrupt the epigenetic landscape, we anticipate a growing need to assay imprinted loci in different mouse models. The resource provided here will facilitate the future analysis of multiple imprinted loci in a single hybrid genetic background.

## Acknowledgements

We would like to thank the epigenetic community at Emory University for their feedback. T. Lee for help in editing this manuscript and A. Ferguson-Smith and M. Bartolomei for feedback on the manuscript. In addition we would like to thank M. Bartolomei for providing the *H19* assay and D. Cutler for bioinformatics assistance. J.A.W was supported by the Biochemistry, Cell and Molecular Biology Training Grant (5T32GM008367). The work was supported by a grant to D.J.K from the National Science Foundation (IOS1354998).

# REFERENCES

- Ancelin K., Syx L., Borensztein M., Ranisavljevic N., Vassilev I., *et al.*, 2016 Maternal LSD1/KDM1A is an essential regulator of chromatin and transcription landscapes during zygotic genome activation. *Elife* 5: 1–24.
- Anway M. D., Anway M. D., Cupp A. S., Cupp A. S., Uzumcu M., *et al.*, 2005 Epigenetic transgenerational actions of endocrine disruptors and male fertility. *Science* 308: 1466–1469.
- Barlow D. P., 2011 Genomic Imprinting : A Mammalian Epigenetic Discovery Model.
- Bartolomei M. S., Tilghman S. M., 1997 Genomic imprinting in mammals. *Annu Rev Genet* 31: 493–525.
- Bartolomei M. S., 2009 Genomic imprinting: Employing and avoiding epigenetic processes. *Genes Dev.* 23: 2124–2133.
- Bartolomei M. S., Ferguson-Smith A. C., 2011 Mammalian genomic imprinting. *Cold Spring Harb. Perspect. Biol.* 3: 1–17.
- Beck J. A., Lloyd S., Hafezparast M., Lennon-Pierce M., Eppig J. T., *et al.*, 2000 Genealogies of mouse inbred strains. *Nat. Genet.* 24: 23–25.
- Bourc’his D., Xu G. L., Lin C. S., Bollman B., Bestor T. H., 2001 Dnmt3L and the establishment of maternal genomic imprints. *Science* 294: 2536–2539.
- Buiting K., 2010 Prader-Willi syndrome and Angelman syndrome. *Am. J. Med. Genet. Part C Semin. Med. Genet.* 154: 365–376.
- Butler M. G., 2011 Prader-Willi Syndrome : Obesity due to Genomic Imprinting. : 204–215.
- Canovas S., Ross P. J., 2016 Epigenetics in preimplantation mammalian development.

Therigenology.

Ciccone D. N., Su H., Hevi S., Gay F., Lei H., *et al.*, 2009 KDM1B is a histone H3K4 demethylase required to establish maternal genomic imprints. *Nature* 461: 415–418.

Dent C. L., Isles A. R., 2014 Brain-expressed imprinted genes and adult behaviour: The example of Nesp and Grb10. *Mamm. Genome* 25: 87–93.

DeVeale B., Kooy D. van der, Babak T., 2012 Critical Evaluation of Imprinted Gene Expression by RNA–Seq: A New Perspective. *PLoS Genet* 8: e1002600.

Docherty L. E., Rezwan F. I., Poole R. L., Turner C. L. S., Kivuva E., *et al.*, 2015 Mutations in NLRP5 are associated with reproductive wastage and multilocus imprinting disorders in humans. *Nat. Commun.* 6: 8086.

Fang R., Barbera A. J., Xu Y., Rutenberg M., Leonor T., *et al.*, 2010 Human LSD2/KDM1b/AOF1 regulates gene transcription by modulating intragenic H3K4me2 Methylation. *Mol. Cell* 39: 222–233.

Ferguson-Smith A. C., 2011 Genomic imprinting: the emergence of an epigenetic paradigm. *Nat. Rev. Genet.* 12: 565–575.

Frazer K. A., Eskin E., Kang H. M., Bogue M. A., Hinds D. A., *et al.*, 2007 A sequence-based variation map of 8.27 million SNPs in inbred mouse strains. *Nature* 448: 1050–1053.

Garfield A. S., Cowley M., Smith F. M., Moorwood K., Stewart-Cox J. E., *et al.*, 2011 Distinct physiological and behavioural functions for parental alleles of imprinted Grb10. *Nature* 469: 534–538.

Gregg C., Zhang J., Weissbourd B., Luo S., Schroth G. P., *et al.*, 2010 High resolution

analysis of parent-of-origin allelic expression in the mouse brain. *Science* 329:

643–648.

Hata K., Okano M., Lei H., Li E., 2002 Dnmt3L cooperates with the Dnmt3 family of de novo DNA methyltransferases to establish maternal imprints in mice. *Development* 129: 1983–1993.

Hayatsu H., Shiraishi M., Negishi K., 2008 Bisulfite modification for analysis of DNA methylation. *Curr. Protoc. Nucleic Acid Chem.*

Horsthemke B., Wagstaff J., 2008 Mechanisms of imprinting of the Prader-Willi/Angelman region. *Am. J. Med. Genet. Part A* 146: 2041–2052.

Howell C. Y., Bestor T. H., Ding F., Latham K. E., Mertineit C., *et al.*, 2001 Genomic Imprinting Disrupted by a Maternal Effect Mutation in the Dnmt1 Gene. *104*: 829–838.

Isles A. R., Ingason A., Lowther C., Walters J., Gawlick M., *et al.*, 2016 Parental Origin of Interstitial Duplications at 15q11.2-q13.3 in Schizophrenia and Neurodevelopmental Disorders. *PLoS Genet.* 12.

Kang E.-R., Iqbal K., Tran D. A., Rivas G. E., Singh P., *et al.*, 2011 Effects of endocrine disruptors on imprinted gene expression in the mouse embryo. *Epigenetics* 6: 937–950.

Karytinis A., Forneris F., Profumo A., Ciossani G., Battaglioli E., *et al.*, 2009 A novel mammalian flavin-dependent histone demethylase. *J. Biol. Chem.* 284: 17775–17782.

Keane T. M., Goodstadt L., Danecek P., White M. A., Wong K., *et al.*, 2011 Mouse genomic variation and its effect on phenotypes and gene regulation. *Nature* 477:

289–94.

Kelsey G., Bartolomei M. S., 2012 Imprinted genes... and the number is? PLoS Genet.

8.

Laird P. W., 2010 Principles and challenges of genome-wide DNA methylation analysis.

Nat. Rev. Genet. 11: 191–203.

Lei H., Bajko J., Xu G., Li E., Ciccone D. N., *et al.*, 2009 KDM1B is a histone H3K4

demethylase required to establish maternal genomic imprints. 461.

Li X., Ito M., Zhou F., Youngson N., Zuo X., *et al.*, 2008a A maternal-zygotic effect

gene, Zfp57, maintains both maternal and paternal imprints. Dev Cell 15: 547–557.

Li X., Ito M., Zhou F., Youngson N., Zuo X., *et al.*, 2008b A Maternal-Zygotic Effect

Gene, Zfp57, Maintains Both Maternal and Paternal Imprints. Dev. Cell 15: 547–

557.

Messerschmidt D. M., Vries W. de, Ito M., Solter D., Ferguson-Smith A., *et al.*, 2012

Trim28 is required for epigenetic stability during mouse oocyte to embryo transition.

Science (80-. ). 335: 1499–1502.

Mitchell A. A., Zwick M. E., Chakravarti A., Cutler D. J., 2004 Discrepancies in dbSNP

confirmation rates and allele frequency distributions from varying genotyping error

rates and patterns. Bioinformatics 20: 1022–1032.

Nekrutenko A., Taylor J., 2012 Next-generation sequencing data interpretation:

enhancing reproducibility and accessibility. Nat Rev Genet 13: 667–672.

Quenneville S., Verde G., Corsinotti A., Kapopoulou A., Jakobsson J., *et al.*, 2011 In

embryonic stem cells, ZFP57/KAP1 recognize a methylated hexanucleotide to

affect chromatin and DNA methylation of imprinting control regions. Mol Cell 44:

472 361–372.

473 Reik W., Dean W., 2001 DNA methylation and mammalian epigenetics. *Electrophoresis*

474 22: 2838–2843.

475 Reik W., Walter J., 2001 GENOMIC IMPRINTING : PARENTAL INFLUENCE ON THE

476 GENOME. 2.

477 Reik W., Santos F., Dean W., 2003 Mammalian epigenomics : reprogramming the

478 genome for development and therapy. 59: 21–32.

479 Scharnhorst V., Eb A. J. Van Der, Jochemsen A. G., 2001 WT1 proteins: Functions in

480 growth and differentiation. *Gene* 273: 141–161.

481 Sherry S. T., Ward M. H., Kholodov M., Baker J., Phan L., *et al.*, 2001 dbSNP: the NCBI

482 database of genetic variation. *Nucleic Acids Res.* 29: 308–311.

483 Smigielski E. M., Sirotkin K., Ward M., Sherry S. T., 2000 dbSNP: a database of single

484 nucleotide polymorphisms. *Nucleic Acids Res.* 28: 352–355.

485 Stewart K. R., Veselovska L., Kim J., Huang J., Saadeh H., *et al.*, 2015 Dynamic

486 changes in histone modifications precede de novo DNA methylation in oocytes.

487 *Genes Dev.* 29: 2449–2462.

488 Strogantsev R., Ferguson-smith A. C., 2012 Proteins involved in establishment and

489 maintenance of imprinted methylation marks. 11.

490 Strogantsev R., Krueger F., Yamazawa K., Shi H., Gould P., *et al.*, 2015 Allele-specific

491 binding of ZFP57 in the epigenetic regulation of imprinted and non-imprinted

492 monoallelic expression. *Genome Biol.* 16: 112.

493 Susiarjo M., Sasson I., Mesaros C., Bartolomei M. S., 2013 Bisphenol A Exposure

494 Disrupts Genomic Imprinting in the Mouse. *PLoS Genet.* 9.



495 Wan L. Ben, Bartolomei M. S., 2008 Chapter 7 Regulation of Imprinting in Clusters:  
496 Noncoding RNAs Versus Insulators. Adv. Genet. 61: 207–223.

497 Wasson J. A., Simon A. K., Myrick D. A., Wolf G., Driscoll S., *et al.*, 2016 Maternally  
498 provided LSD1/KDM1A enables the maternal-to-zygotic transition and prevents  
499 defects that manifest postnatally. Elife 5.

500 Yalcin B., Wong K., Agam A., Goodson M., Keane T. M., *et al.*, 2011 Sequence-based  
501 characterization of structural variation in the mouse genome. Nature 477: 326–9.

502 Yamaguchi S., Shen L., Liu Y., Sendler D., Zhang Y., 2013 Role of Tet1 in erasure of  
503 genomic imprinting. Nature 504: 460–464.

504 Zhang Q., Qi S., Xu M., Yu L., Tao Y., *et al.*, 2012 Structure-function analysis reveals a  
505 novel mechanism for regulation of histone demethylase LSD2/AOF1/KDM1b. Cell  
506 Res. 2: 1–17.

507



[illegible]

|        |    |            |             |             |   |   |   |   |   |   |   |   |   |     |   |   |   |   |   |   |   |     |
|--------|----|------------|-------------|-------------|---|---|---|---|---|---|---|---|---|-----|---|---|---|---|---|---|---|-----|
| peg10  | 6  | 4,748,341  | rs219518254 | C           | - | - | - | - | - | - | - | - | - | -   | - | - | - | - | T | - | - | Yes |
| peg10  | 6  | 4,748,351  | rs232401063 | G           | - | - | - | - | - | - | - | - | - | -   | - | - | - | - | T | - | - | Yes |
| peg10  | 6  | 4,748,382  | rs255746717 | G           | - | - | - | - | - | - | - | - | - | -   | - | - | - | - | A | - | - | Yes |
| peg10  | 6  | 4,748,384  | rs221372133 | T           | - | - | - | - | - | - | - | - | - | C   | - | - | - | - | C | C | - | Yes |
| peg10  | 6  | 4,748,413  | rs247977393 | T           | - | - | - | - | - | - | - | - | - | -   | - | - | - | - | A | C | - | Yes |
| peg10  | 6  | 4,748,442  | rs266229559 | A           | - | - | - | - | - | - | - | - | - | -   | - | - | - | - | - | G | - | Yes |
| peg10  | 6  | 4,748,482  | rs220730338 | C           | - | - | - | - | - | - | - | - | - | -   | - | - | - | - | A | - | - | Yes |
| snrpn  | 7  | 60,005,033 | rs242447374 | G           | - | - | - | - | - | - | - | - | - | -   | - | - | - | - | - | A | - | Yes |
| snrpn  | 7  | 60,005,074 | rs251725430 | C           | - | - | - | - | - | - | - | - | - | -   | - | - | - | - | - | T | - | Yes |
| snrpn  | 7  | 60,005,215 | rs46036463  | C           | A | - | - | - | - | - | - | - | - | A   | - | A | - | - | A | A | - | Yes |
| snrpn  | 7  | 60,005,223 | rs48319825  | C           | T | - | - | - | - | - | - | - | - | -   | - | T | - | - | T | - | - | Yes |
| snrpn  | 7  | 60,005,271 | rs249374171 | G           | A | - | - | - | - | - | - | - | - | A   | - | A | - | - | A | - | - | Yes |
| snrpn  | 7  | 60,005,282 | rs220727244 | G           | A | - | - | - | - | - | - | - | - | A   | - | A | - | - | A | A | - | Yes |
| snrpn  | 7  | 60,005,295 | rs581771758 | C           | - | - | - | - | - | - | - | - | - | T   | - | - | - | - | - | - | - | Yes |
| snrpn  | 7  | 60,005,301 | rs227207367 | T/-         | - | - | - | - | - | - | - | - | - | -   | - | - | - | - | - | - | - | No  |
| snrpn  | 7  | 60,005,303 | rs262190054 | AAAAAAA/-   | - | - | - | - | - | - | - | - | - | -   | - | - | - | - | - | - | - | No  |
| snrpn  | 7  | 60,005,303 | rs50790468  | T           | - | - | - | - | - | - | - | - | - | A   | - | - | - | - | - | - | - | No  |
| snrpn  | 7  | 60,005,303 | rs223695856 | AAA         | - | - | - | - | - | - | - | - | - | DEL | - | - | - | - | - | - | - | No  |
| snrpn  | 7  | 60,005,316 | UNNAMED     | A           | - | - | - | - | - | - | - | - | - | C   | - | - | - | - | - | - | - | No  |
| plagl1 | 10 | 13,091,157 | UNNAMED     | C/T         | - | - | - | - | - | - | - | - | - | -   | - | - | - | - | - | - | - | No  |
| plagl1 | 10 | 13,091,167 | rs50316897  | C           | - | - | - | - | - | - | - | - | - | T   | - | T | - | - | T | - | - | Yes |
| plagl1 | 10 | 13,091,224 | UNNAMED     | T/C         | - | - | - | - | - | - | - | - | - | -   | - | - | - | - | - | - | - | No  |
| plagl1 | 10 | 13,091,272 | rs239807843 | T           | - | - | - | - | - | - | - | - | - | -   | - | - | - | - | - | C | - | Yes |
| plagl1 | 10 | 13,091,284 | rs256922784 | C           | - | - | - | - | - | - | - | - | - | -   | - | - | - | - | - | T | - | Yes |
| plagl1 | 10 | 13,091,296 | rs29364824  | A           | - | - | - | - | - | - | - | - | - | G   | - | G | - | - | G | G | G | Yes |
| plagl1 | 10 | 13,091,347 | rs265555072 | A/-         | - | - | - | - | - | - | - | - | - | -   | - | - | - | - | - | - | - | No  |
| plagl1 | 10 | 13,091,403 | rs254561304 | A/-         | - | - | - | - | - | - | - | - | - | -   | - | - | - | - | - | - | - | No  |
| plagl1 | 10 | 13,091,531 | rs214125987 | AAAAAAAAA/- | - | - | - | - | - | - | - | - | - | -   | - | - | - | - | - | - | - | No  |
| plagl1 | 10 | 13,091,559 | UNNAMED     | C/-         | - | - | - | - | - | - | - | - | - | -   | - | - | - | - | - | - | - | No  |
| plagl1 | 10 | 13,091,566 | UNNAMED     | C/T         | - | - | - | - | - | - | - | - | - | -   | - | - | - | - | - | - | - | No  |

**Table 1: The complete list of all the SNPs from 3 databases within surveyed regions**

Orange SNP is the SNP we have found, it is not present in any database

Red SNPs are validated polymorphisms.

Blue SNPs are C/T (or G/A) variations that Bisulfite sequencing assay can't detect.

Purple SNP is the only inconsistency between our sequencing result (C on B6 background) and the reported Sanger data (G on B6 background).

Green nucleotides show the present polymorphism on both assayed backgrounds (B6 and CAST) at reported SNP locations
